# Supplementary material for: Molecular satellite dishes: attaching parabolic and planar arenes to heterofullerenes
Source: Royal Society of Chemistry journal article supplement (doi:10.1039/b316139k), 2004-01-01

# Supplementary Material –

- Molecular Satellite Dishes: Attaching Parabolic and Planar Arenes to Heterofullerenes -

**PM3-Calculations (Oribital Energies in eV)**

|  | **C59N-Corannulene (**4**)** | **C59N-Coronene (**3**)** | **C59N-Pyrene (**2**)** |
| --- | --- | --- | --- |
| **HOMO-1** | **-9,112 (ar)** | **-8,442 (ar)** | **-8,932 (C59N)** |
| **HOMO** | **-8,967 (C59N)** | **-8,425 (ar)** | **-8,436 (ar)** |
| **LUMO** | **-2,909 (C59N)** | **-2,896 (C59N)** | **-2,888 (C59N)** |
| **LUMO+1** | **-2,833 (C59N)** | **-2,819 (C59N)** | **-2,814 (C59N)** |

|  | **Corannulene** | **Coronene** | **Pyrene** |
| --- | --- | --- | --- |
| **HOMO-1** | **-8,960** | **-8,294** | **-9,042** |
| **HOMO** | **-8,959** | **-8,277** | **-8,249** |
| **LUMO** | **-0,993** | **-1,072** | **-1,010** |
| **LUMO+1** | **-0,992** | **-1,057** | **-0,336** |

|  | **C59NH** |
| --- | --- |
| **HOMO-1** | **-9,421** |
| **HOMO** | **-8,976** |
| **LUMO** | **-2,907** |
| **LUMO+1** | **-2,834** |

**4**

LUMO+1


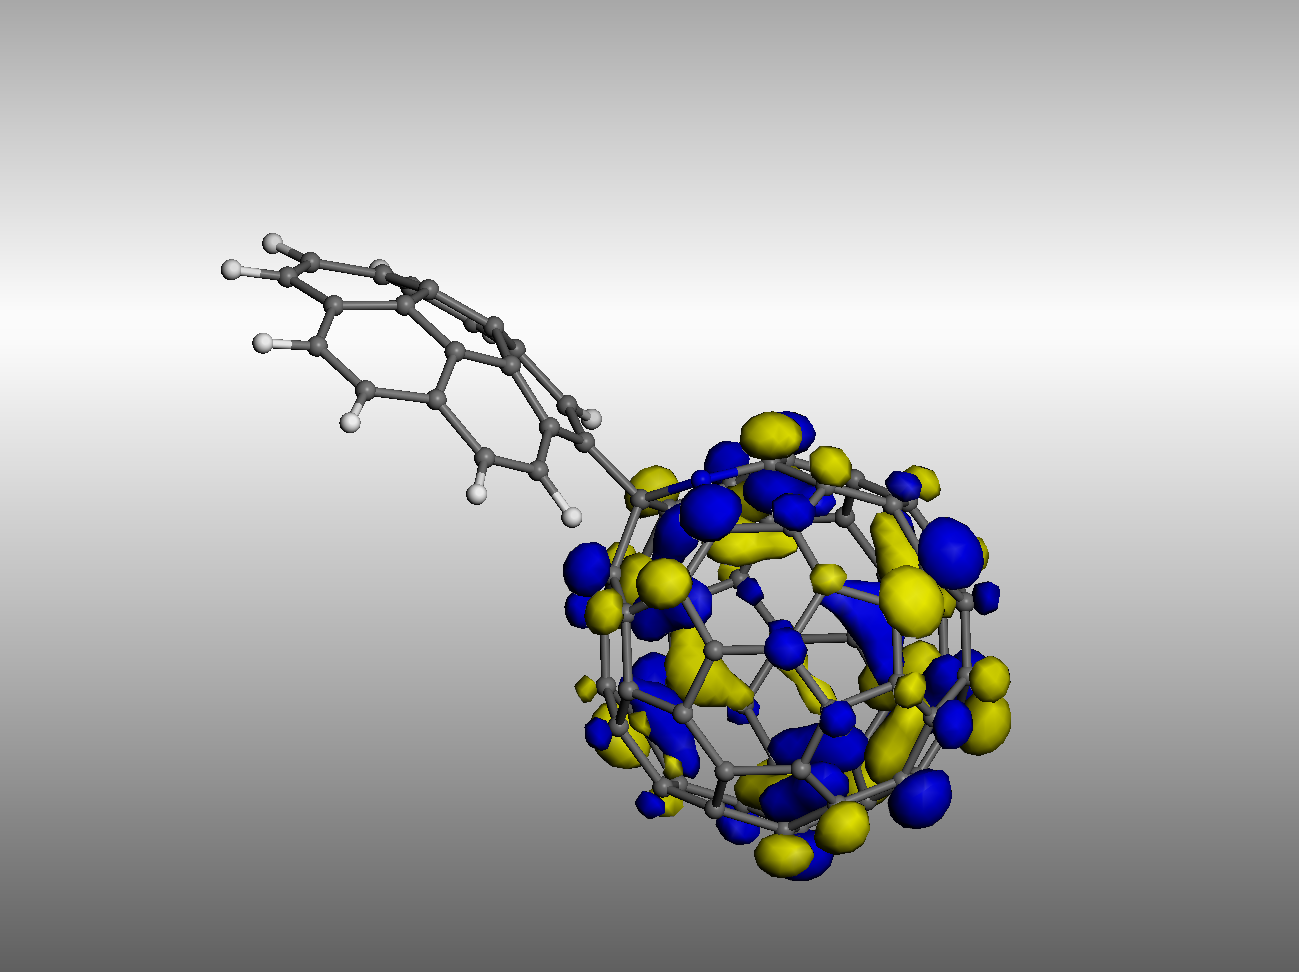


LUMO

**
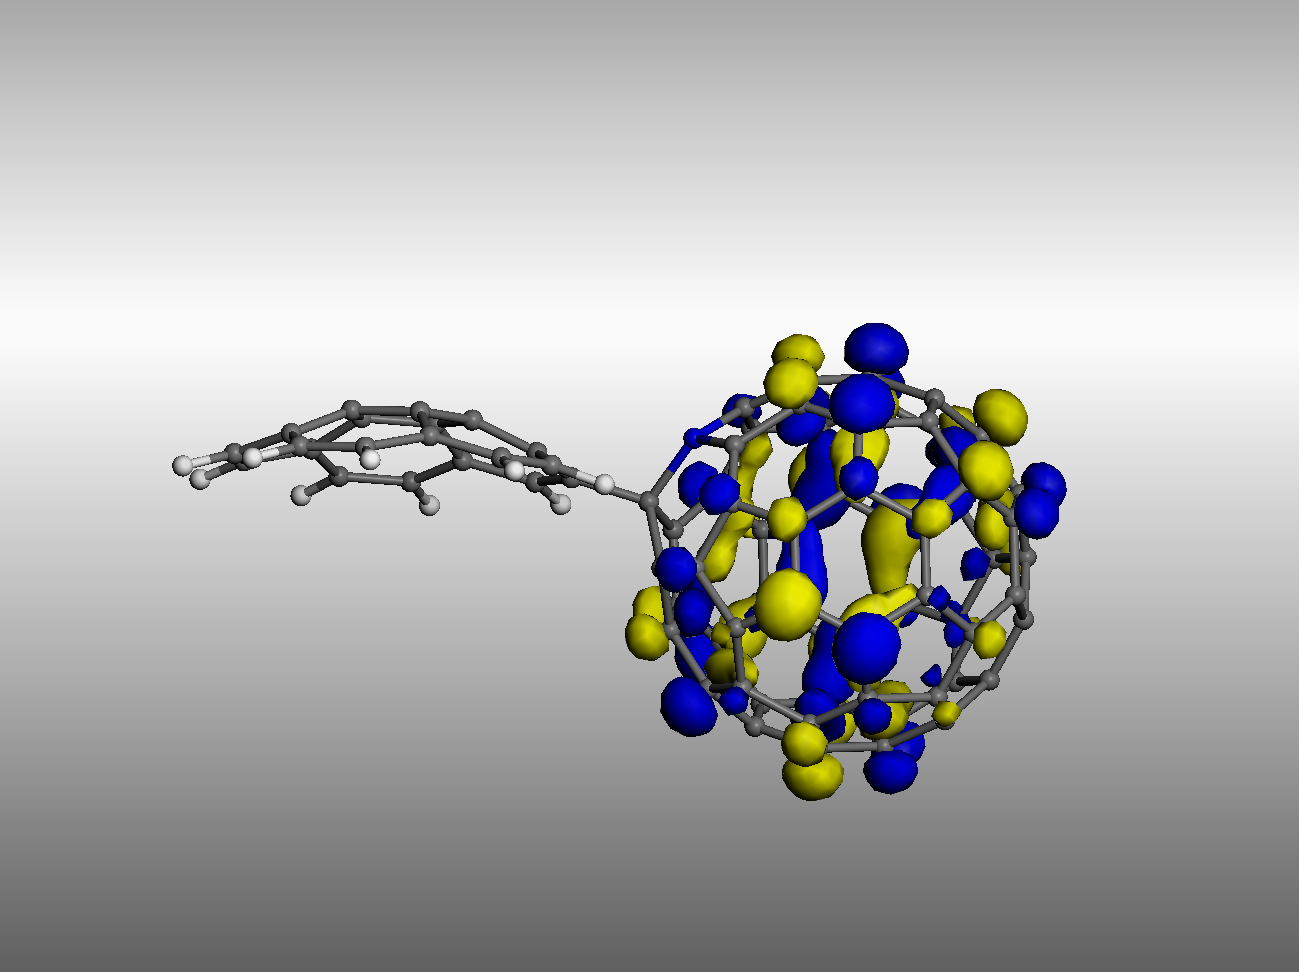
**


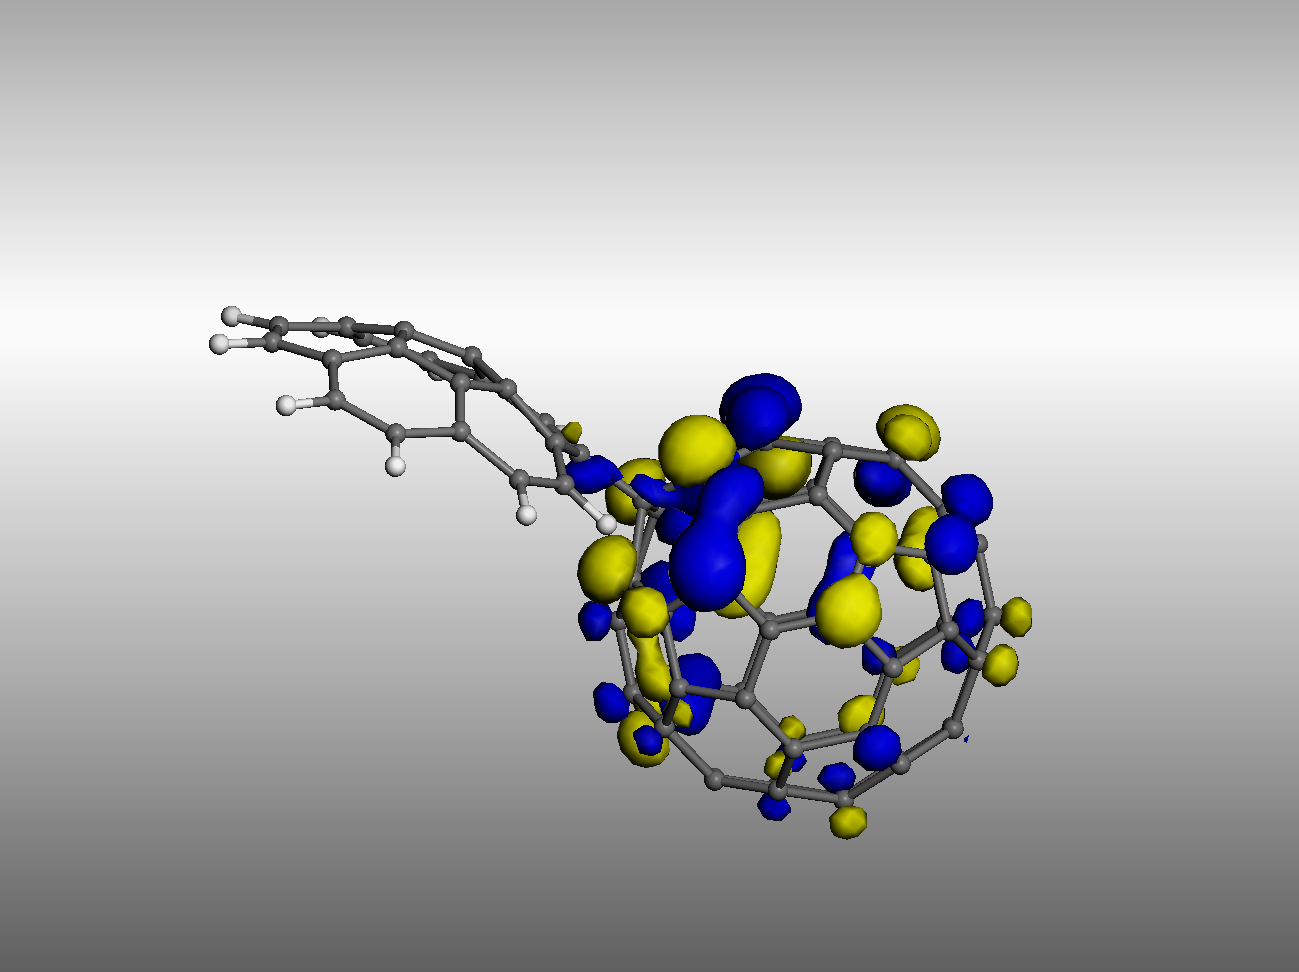
HOMO

HOMO-1


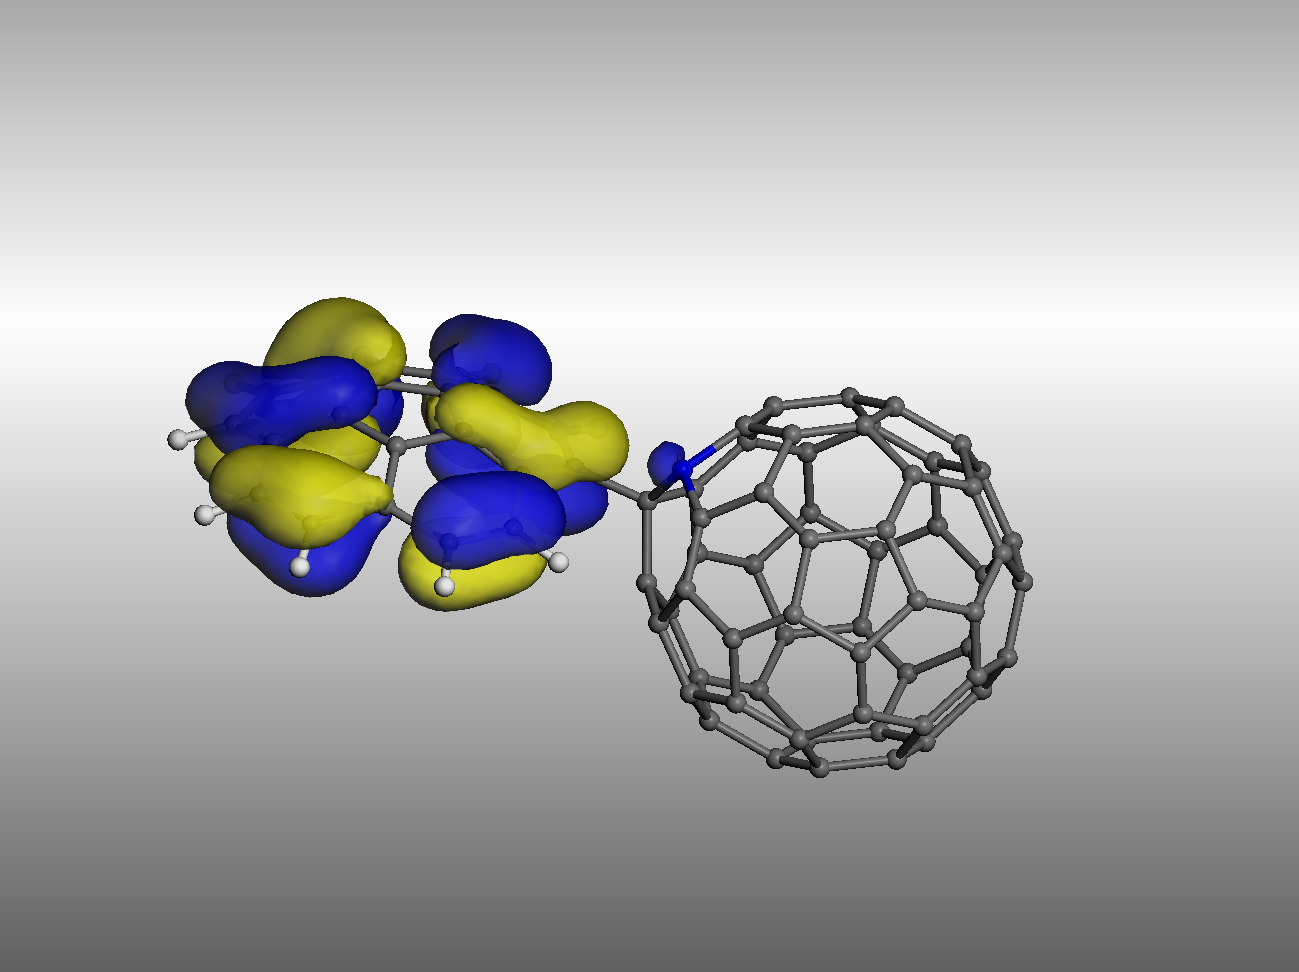


**3**

LUMO+1


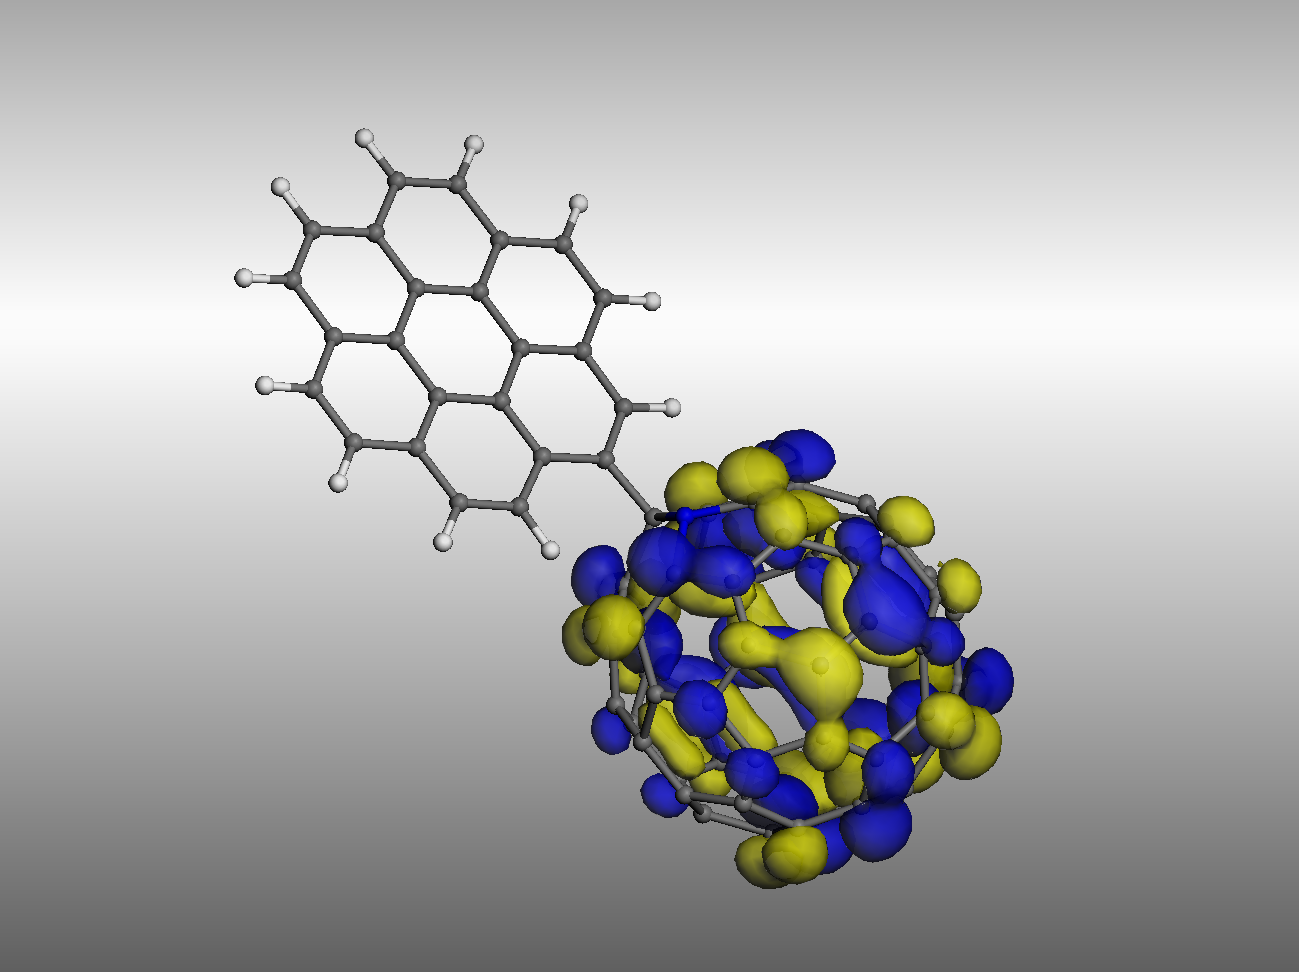


LUMO


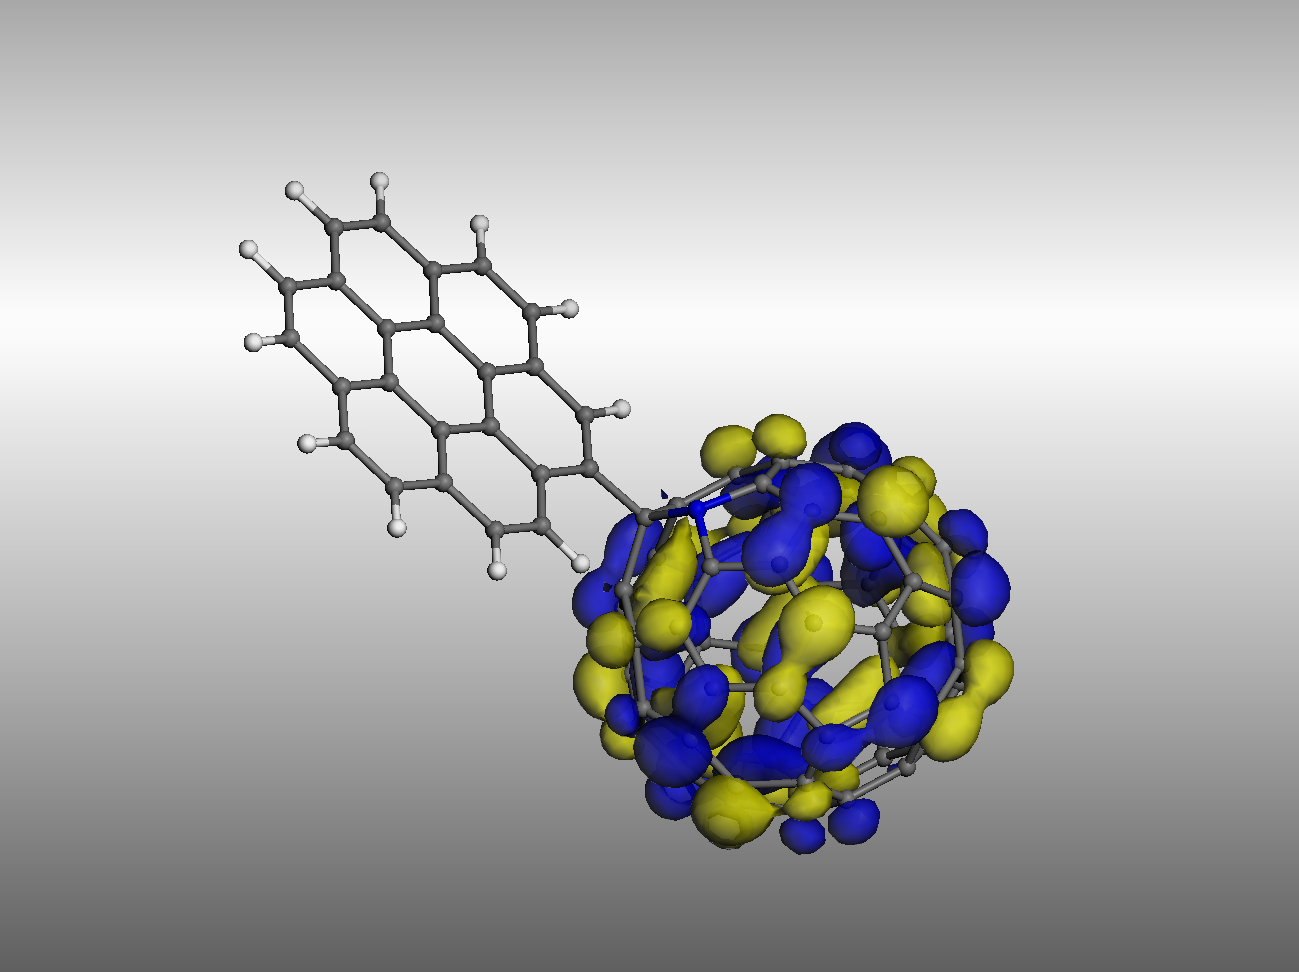


HOMO


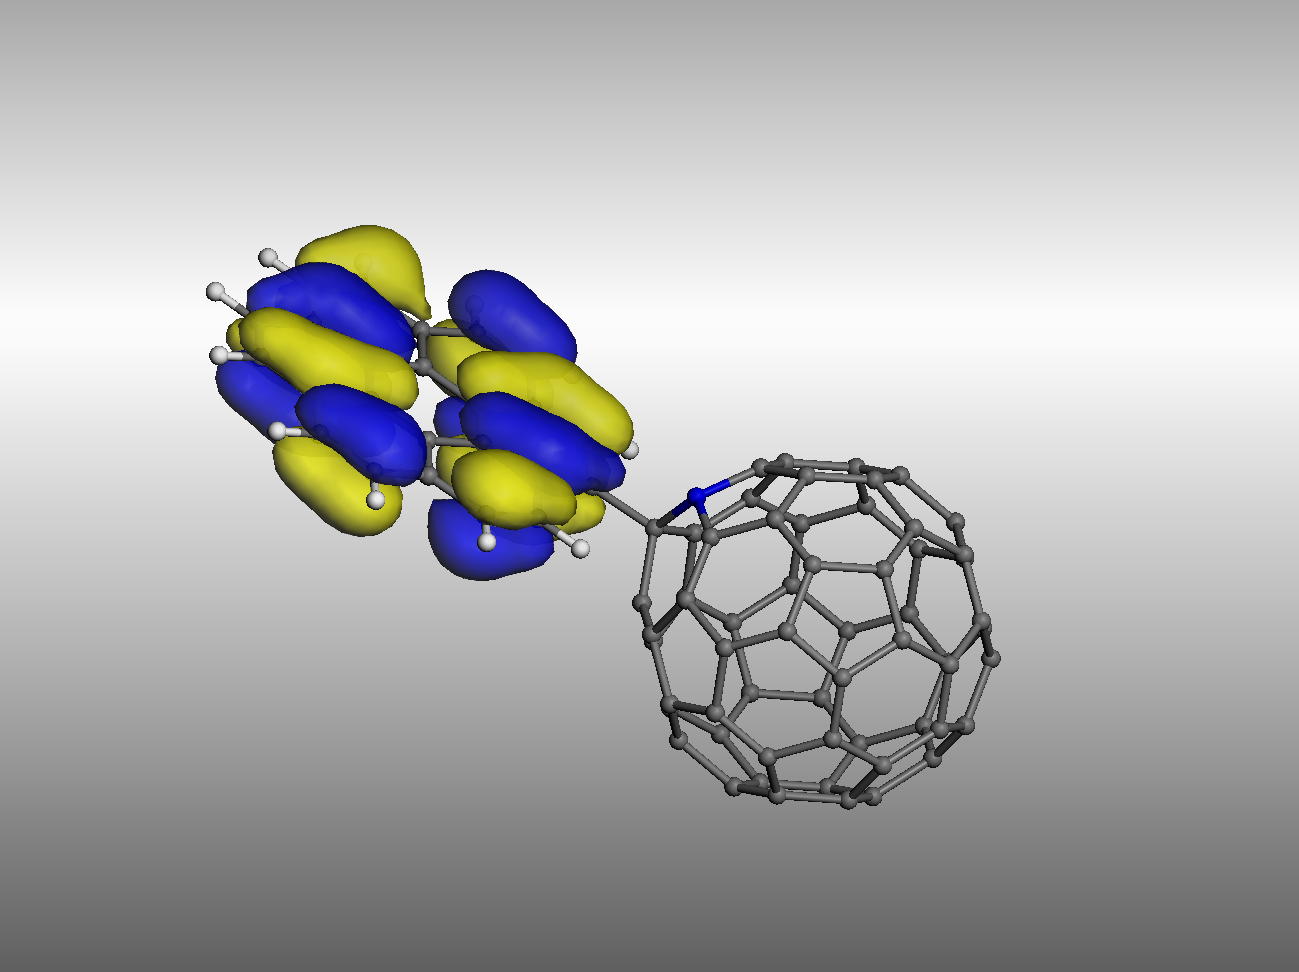


HOMO-1


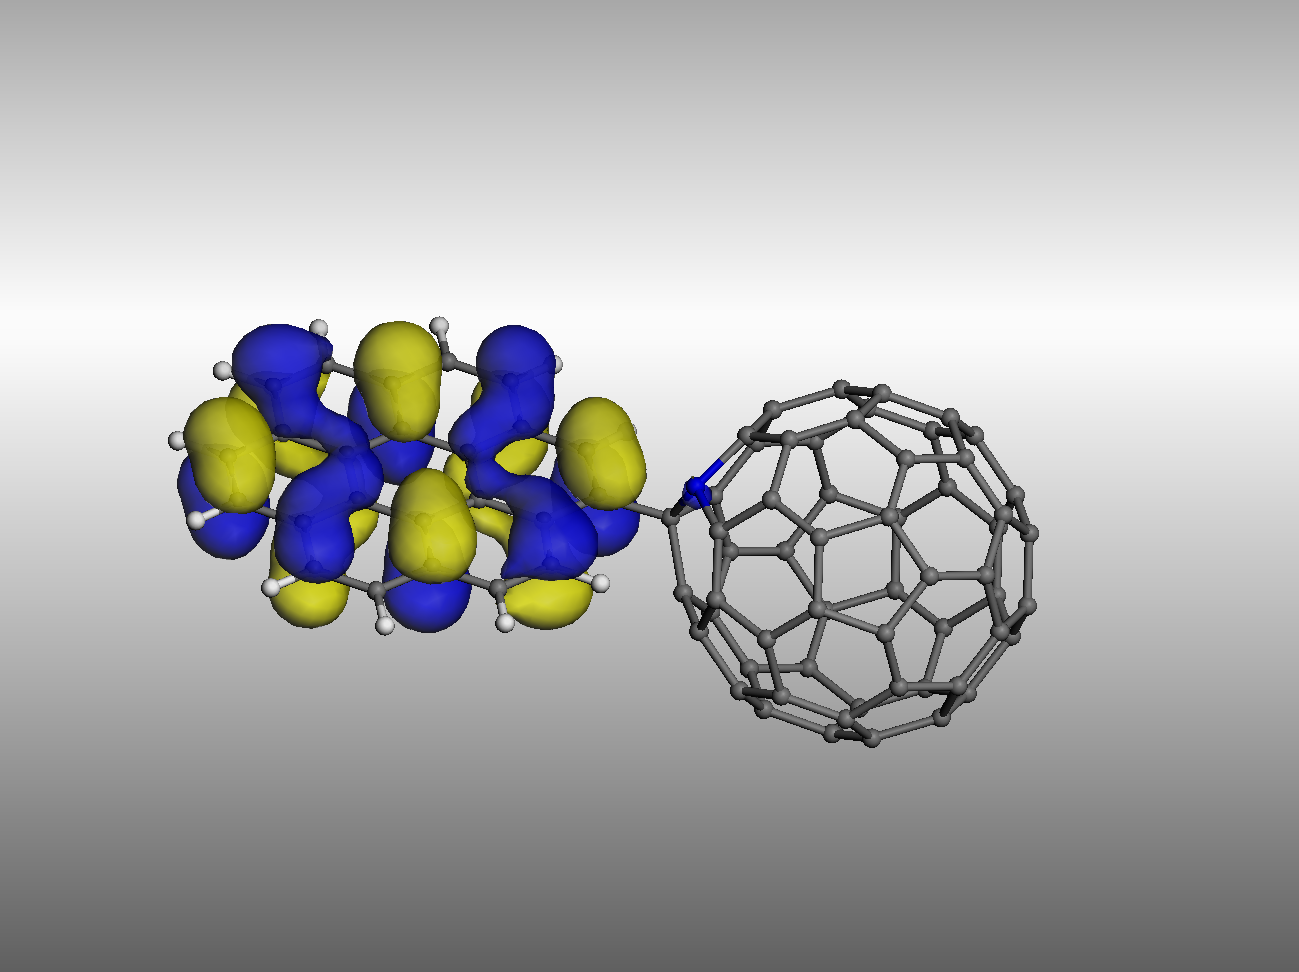


**2**

LUMO+1


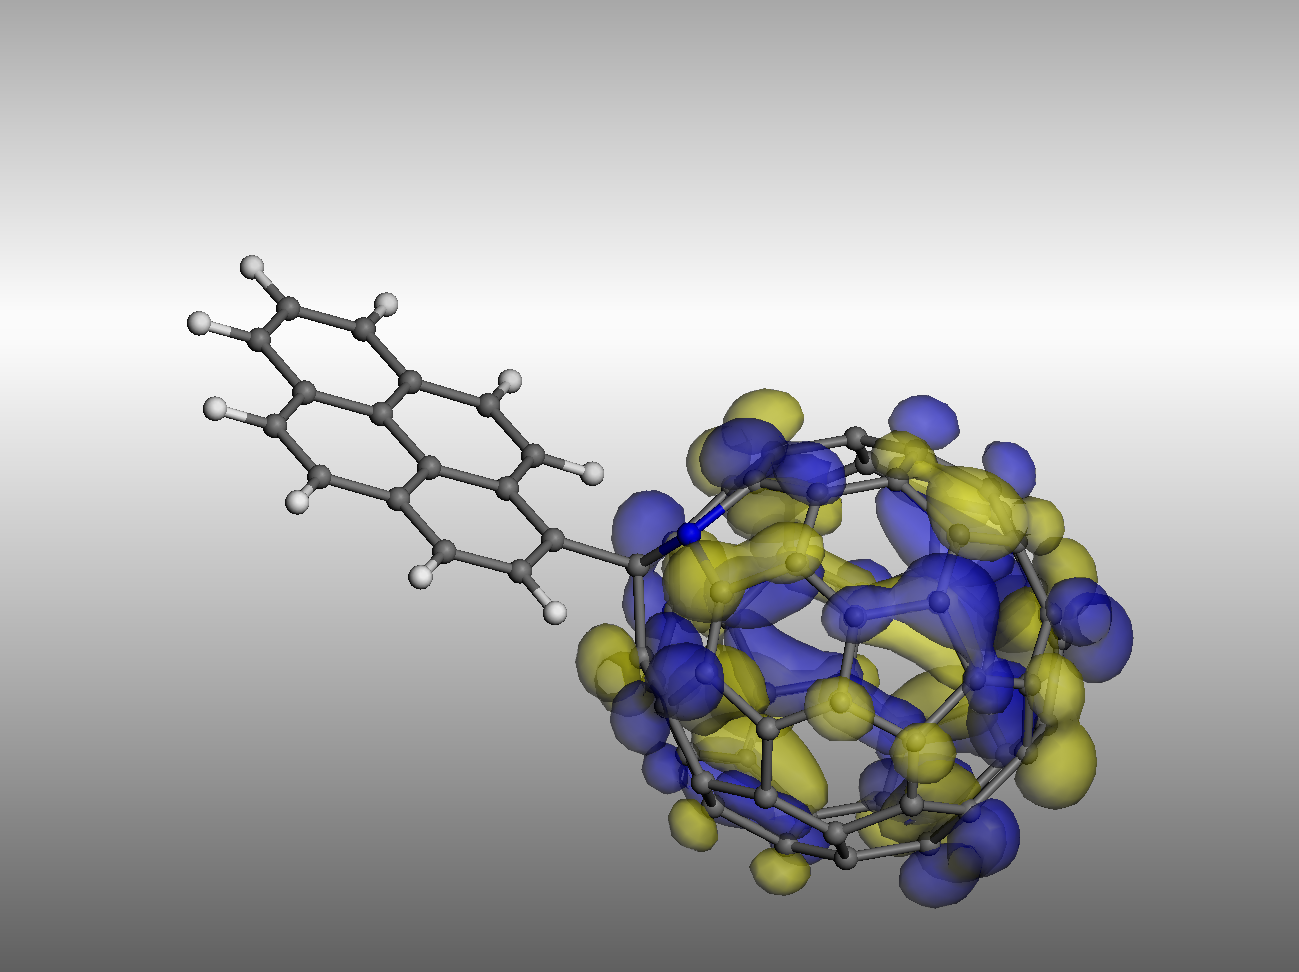


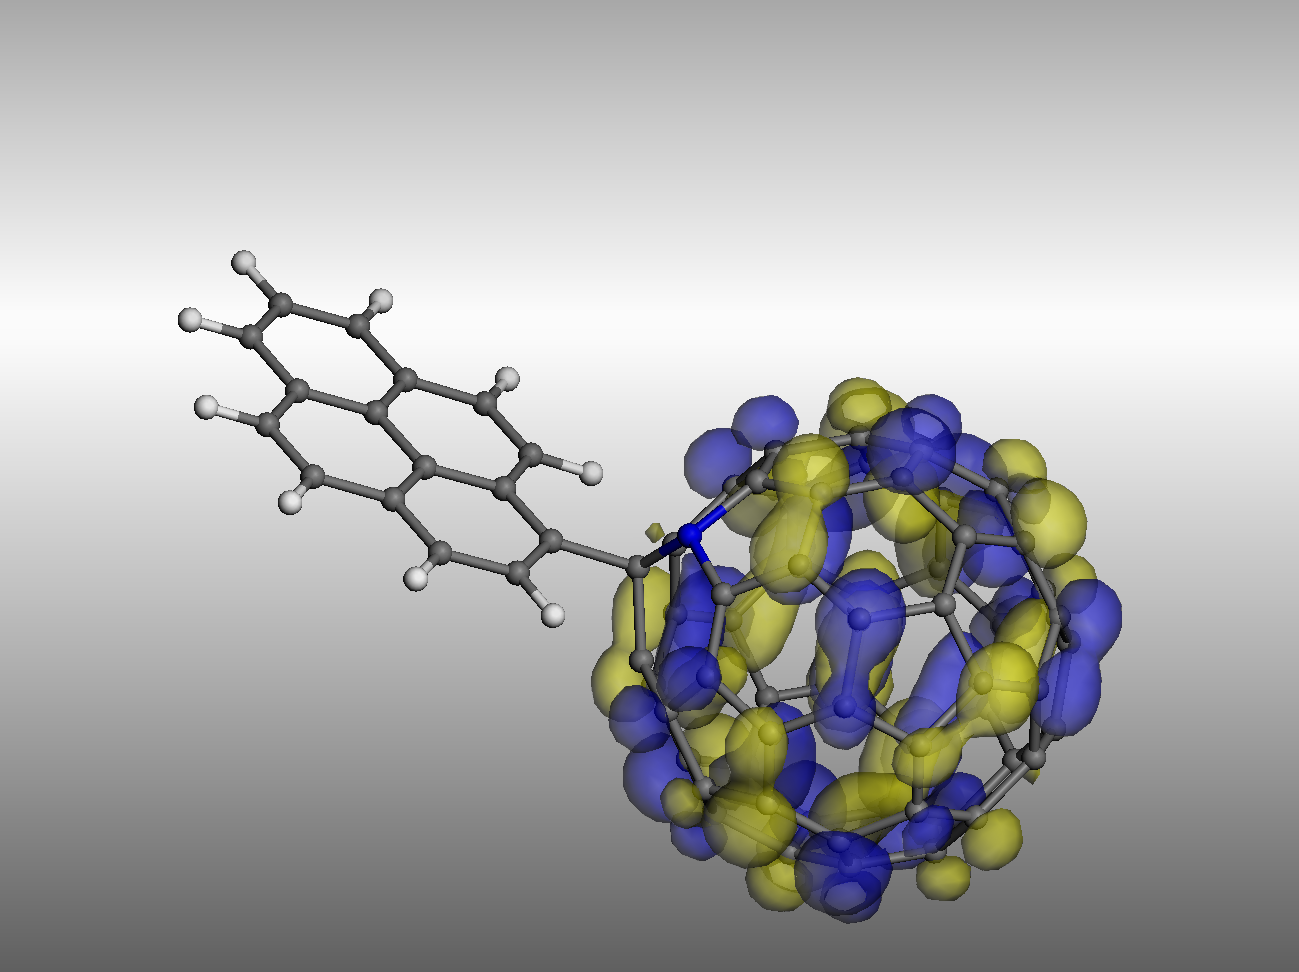
LUMO

HOMO


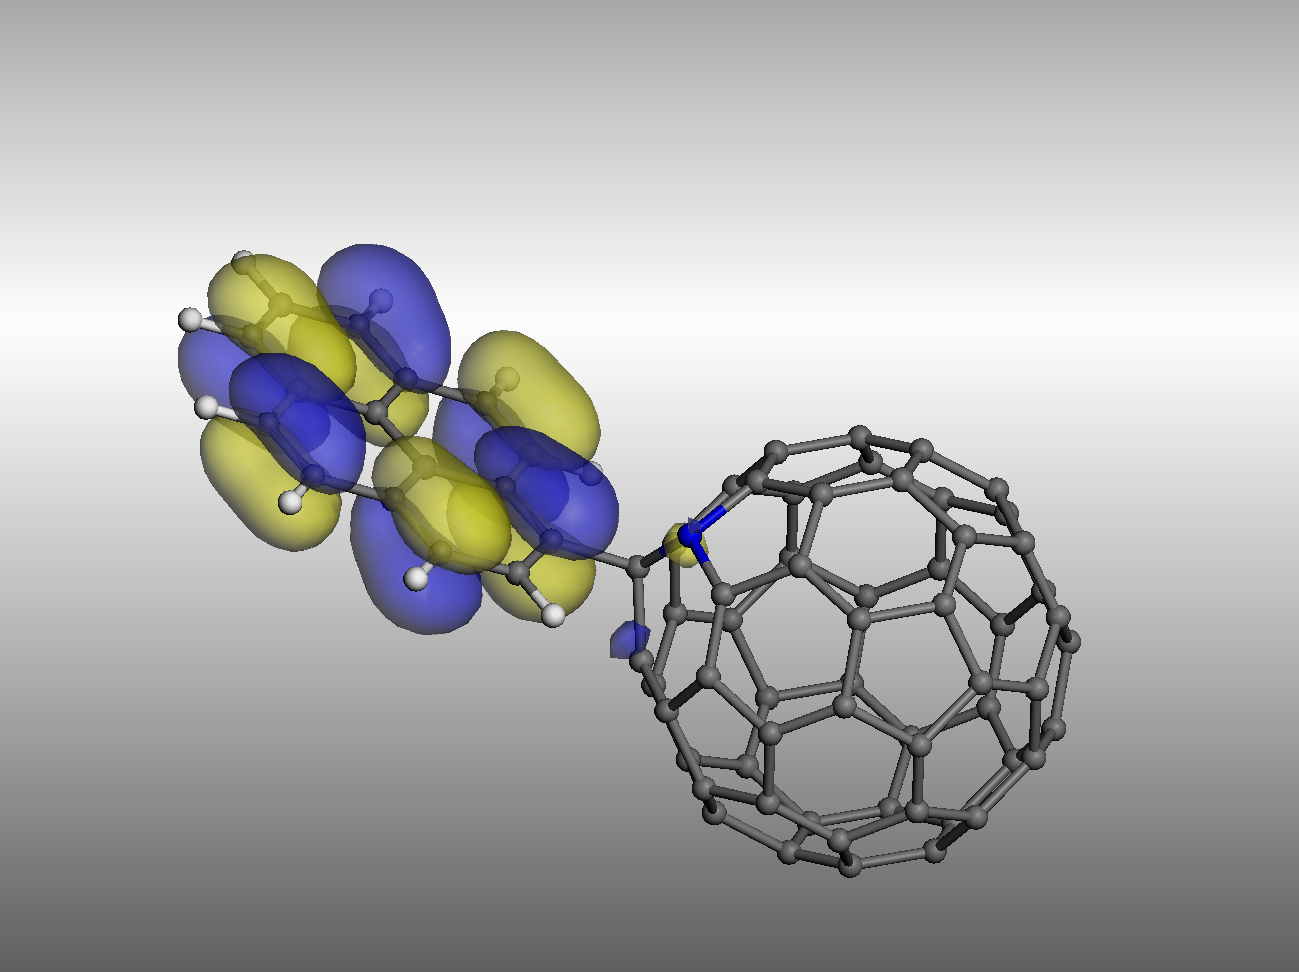


HOMO-1


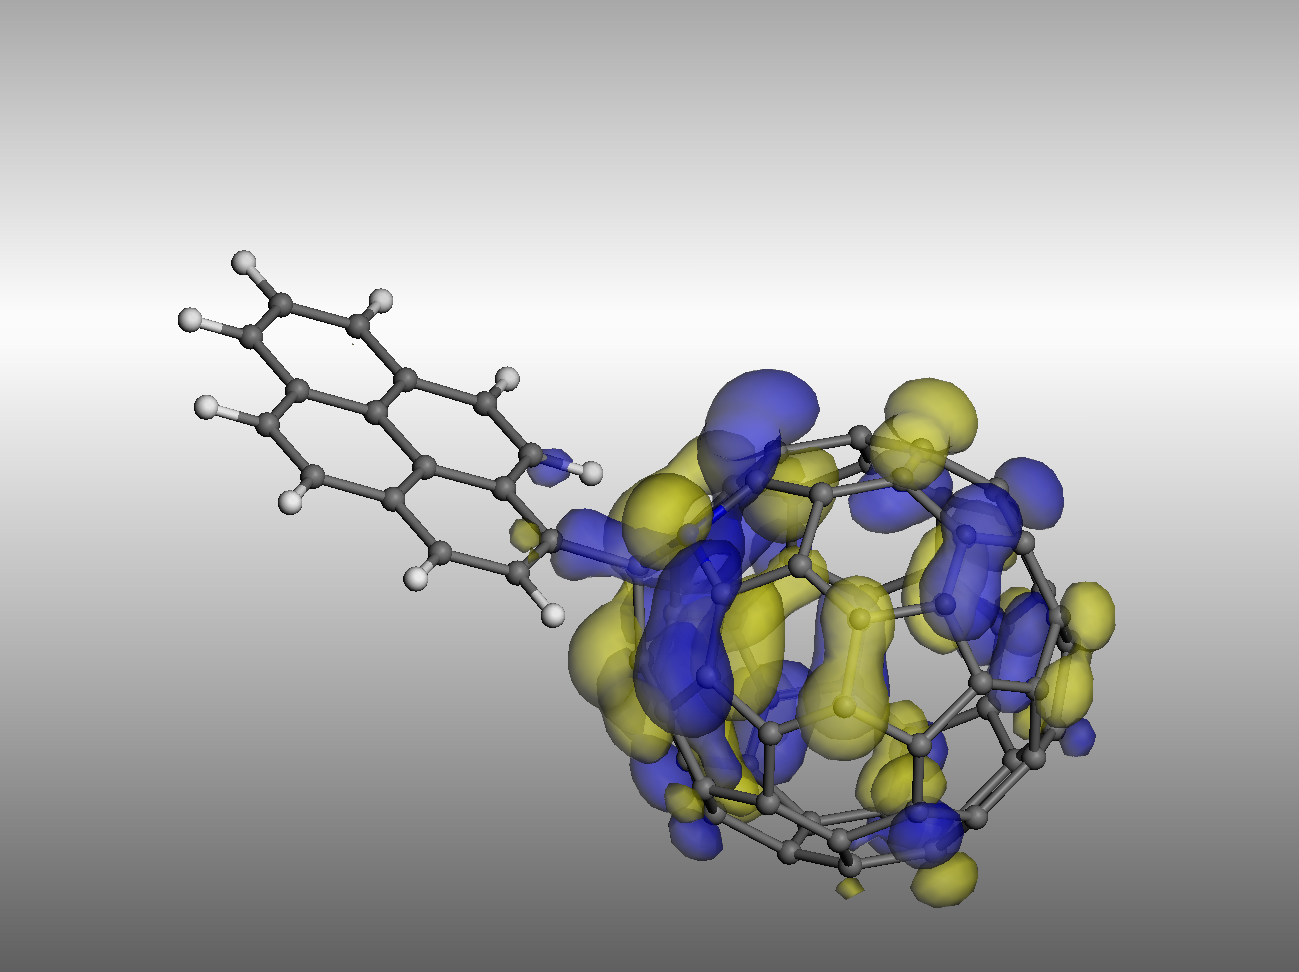

Supplement: b316139k.doc [file b316139k.doc]
